# Supplementary material
Source: PubMed Central journal article supplement (PMC2838069)
Supplement: supp_30_7_1769__2.pdf [file supp_30_7_1769__2.pdf]

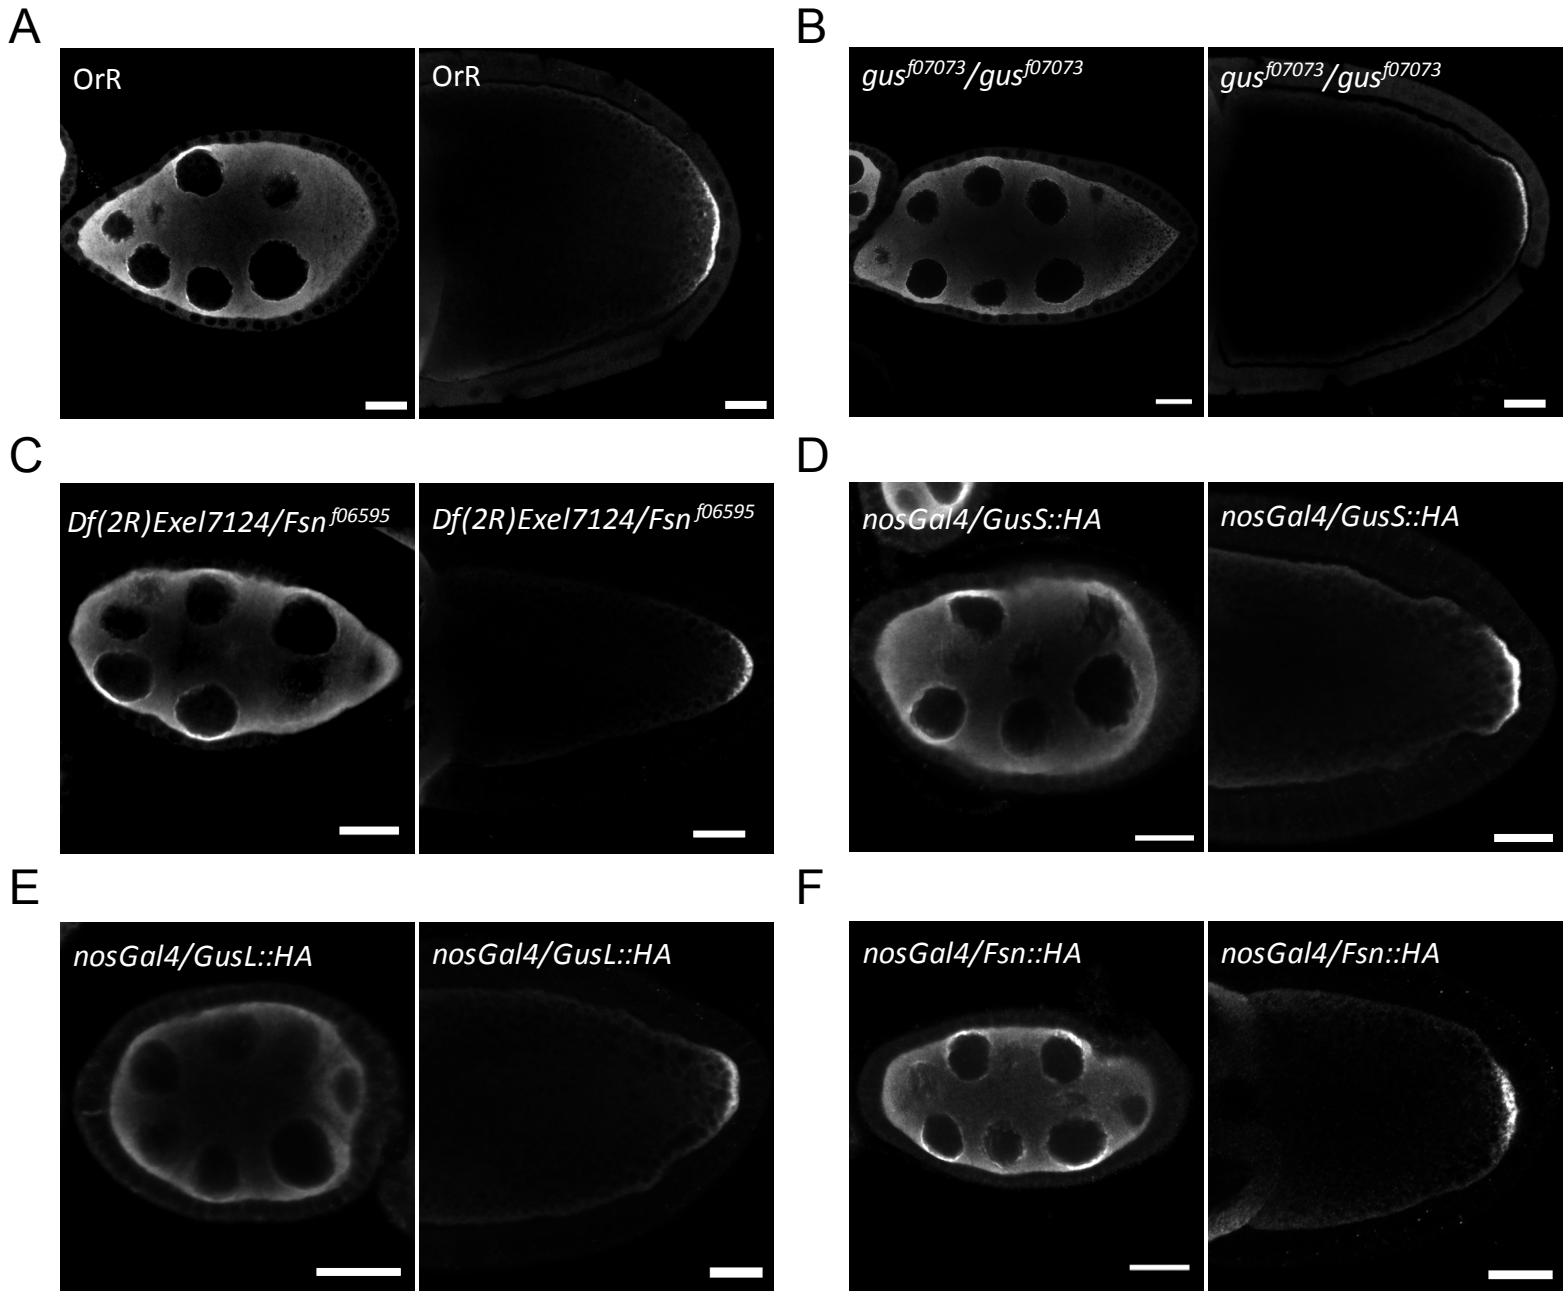

**Suppl. Fig. 2: Vas distribution is not globally affected by Gus and Fsn.**

(A-F) Ovaries immunolabelled for Vas. (A) OrR, (B) *gus<sup>f07073</sup>/gus<sup>f07073</sup>*, (C) *Df(2R)Exel7124/Fsn<sup>f06595</sup>*, (D) *nosGal4/GusS::HA*, (E) *nosGal4/GusL::HA*, (F) *nosGal4/Fsn::HA*. In all genetic backgrounds analysed, Vas accumulates both in the perinuclear nuage in nurse cells as well as in the posterior pole plasm in the oocyte. Levels in the images are electronically adjusted to emphasize the spatial distribution of Vas. Scale bars represent 20  $\mu\text{m}$ .
